# Supplementary material for: MicroRNA-299-5p inhibits cell metastasis in breast cancer by directly targeting serine/threonine kinase 39
Source: PubMed Central journal article supplement — Oncol Rep. 2020 Jan 31;43(4):1221–33. doi: 10.3892/or.2020.7486 (PMC7057922; doi:10.3892/or.2020.7486), 2020-01-31
Supplement: Supplementary_Data.pdf [file Supplementary_Data.pdf]

Figure S1. miR-299-5p exerts no effect on cell proliferation and apoptosis. (A) MTT assay of MDA-MB-231 and MCF-7 cells following transfection with miR-299-5p mimics or miR-299-5p inhibitor compared with the negative control, respectively. \* $P < 0.05$ . (B) Cell apoptosis was detected by flow cytometry in MDA-MB-231 and MCF-7 cells transfected with miR-299-5p mimics or inhibitor. Apoptotic evaluation was carried out by calculating the percentage of apoptotic cells. Data are expressed as the mean  $\pm$  standard error of mean. MTT, Methylthiazolyldiphenyl-tetrazolium bromide; ctrl, control.

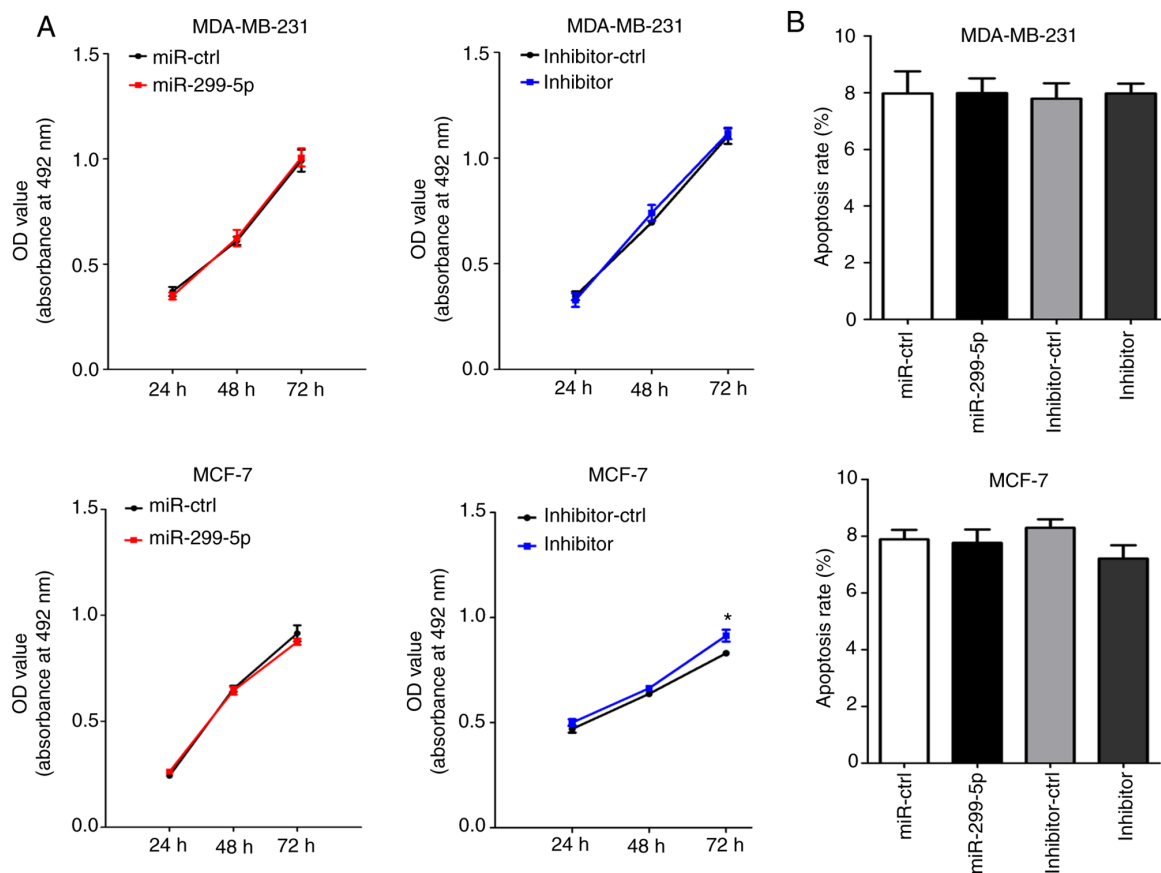

Figure S2. Tumorigenicity assay in nude mice subcutaneous transfection model. (A) Image of tumors derived from lentivirus-miR-ctrl and lentivirus-miR-299-5p MDA-MB-231 cells in nude mice (n=5). (B) Tumor volumes. (C) Tumor weights of 2 groups. Data are presented as the mean  $\pm$  standard error of mean.

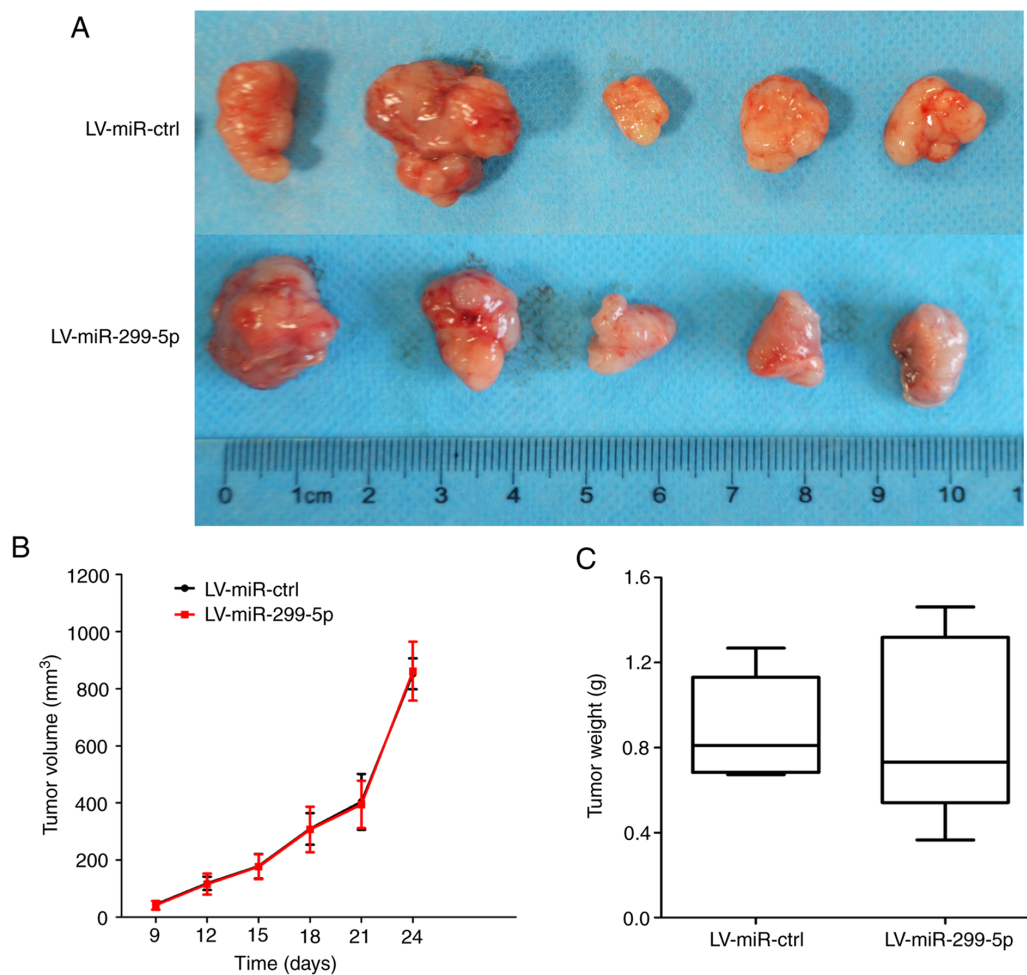

Table SI. Primers and oligonucleotides used in the present study.

| Gene name            | Sequence (5'-3')                                       |
|----------------------|--------------------------------------------------------|
| siSTK39-1 sense      | GCUGGUCAUGAAAUUACUATT                                  |
| siSTK39-1 antisense  | UAGUAAUUUCAUGACCAGCTT                                  |
| siSTK39-2 sense      | GGAUUUGAAAGCUGGUAUUTT                                  |
| si-STK39-2 antisense | AUUACCAGCUUUCAAAUCCTT                                  |
| si-ctrl sense        | UUCUCCGAACGUGUCACGUTT                                  |
| si-ctrl antisense    | ACGUGACACGUUCGGAGAATT                                  |
| miR-299-5p-RT        | GTCGTATCCAGTGCCTGTCTGGAGTCGGCAATTGCACTGGATACGACATGTATG |
| miR-299-5p-F         | ATCCAGTGCCTGTCTGG                                      |
| miR-299-5p-R         | TGCTTGGTTTACCGTCCCA                                    |
| U6-RT                | CGCTTCACGAATTTGCGTGTCAT                                |
| U6-F                 | GCTTCGGCAGCACATATACTAAAAT                              |
| U6-R                 | CGCTTCACGAATTTGCGTGTCAT                                |
| STK39-F              | GCCATCCCAACGTAGTGACC                                   |
| STK39-R              | TGTTCTCCTCGGTTGACAATGTA                                |
| $\beta$ -actin-F     | CCAACCGCGAGAAGATGA                                     |
| $\beta$ -actin-R     | CCAGAGGCGTACAGGGATAG                                   |

STK39, serine/threonine kinase 39; si-ctrl, small interfering RNA control; RT, reverse transcription primer.
